# Supplementary material for: Synergistic effects of engineered nanoparticles and organics released from laser printers using nano-enabled toners: potential health implications from exposures to the emitted organic aerosol
Source: Royal Society of Chemistry journal article supplement (doi:10.1039/c7en00573c), 2017-01-01
Supplement: c7en00573c1.pdf [file c7en00573c1.pdf]

## Supplemental Information

Marie-Cecile G. Chalbot<sup>a\*</sup>, Sandra V. Pirela<sup>b\*</sup>, Laura Schifman<sup>c</sup>, Varun Kasaraneni<sup>c</sup>, Vinka Oyanedel-Craver<sup>c</sup>, Dhimiter Bello<sup>b</sup>, Vincent Castranova<sup>d</sup>, Yong Qian<sup>e</sup>, Treye Thomas<sup>f</sup>, Ilias G. Kavouras<sup>a,\*\*</sup>, Philip Demokritou<sup>b,\*\*</sup>

<sup>a</sup> Department of Environmental Health Sciences, University of Alabama at Birmingham, Birmingham, Alabama.

<sup>b</sup> Department of Environmental Health, Center for Nanotechnology and Nanotoxicology, T.H. Chan School of Public Health, Harvard University, Boston, Massachusetts.

<sup>c</sup> Department of Civil and Environmental Engineering, University of Rhode Island, Kingston, Rhode Island.

<sup>d</sup> Department of Pharmaceutical Sciences/School of Pharmacy, West Virginia University, Morgantown, West Virginia.

<sup>e</sup> Pathology and Physiology Research Branch, Health Effects Laboratory Division, National Institute for Occupational Safety and Health, Morgantown, West Virginia.

<sup>f</sup> U.S. Consumer Product Safety Commission, Office of Hazard Identification and Reduction, Rockville, Maryland.

\*Equally contributing first authors

\*\* Corresponding authors

## 1 1. $^1\text{H}$ - $^1\text{H}$ COSY

2 COSY NMR spectra for PEPs revealed a range of resonances attributed to  $\text{CH}_3$ ,  $-\text{CH}_2-$  and  
3  $-\text{CH}-\text{X}$  (X: C or O) groups (Fig. S1a) and cross peaks of  $\text{sp}^3$ -hybridized carbon on aromatic rings  
4 (phenyl- $\text{CH}-$ ). Cross peaks of  $\text{sp}^3$ - hybridized aliphatic carbon attached to an oxygenated group  
5 such as  $\text{HC}_{\text{sp}^3}(\text{O})-\text{C}_{\text{sp}^3}-\text{H}$ ,  $\text{H}-\text{C}_{\text{sp}^3}(\text{O})-\text{C}_{\text{sp}^3}(\text{O})\text{H}$  and/or ester-derivatives  $(\text{R}(=\text{O})\text{O}-\text{C}_{\text{sp}^3}\text{H}_2-$   
6  $\text{C}_{\text{sp}^3}\text{H}(\text{C}_{\text{sp}^3}\text{H}_3)-\text{R}(\text{or OR}))$  (Fig. S1b, and cross peaks of aliphatic saturated alcohols  $(\text{R}-\text{CH}_2-\text{OH})$   
7 (Fig. S1c) were also observed. In the aromatic region, cross peaks at  $\delta_{\text{H}}$  (F1:  $\delta_{\text{H}}$  6.80 ppm and F2:  
8  $\delta_{\text{H}}$  7.11 ppm; Fig. S1b) may be associated with non-exchangeable hydrogen in *o*- and *m*- position  
9 of a styrene ring. The lack of coupling with these cross peaks at  $\delta_{\text{H}}$  6.80 and  $\delta_{\text{H}}$  7.11 ppm was  
10 indicative of the absence of 4-vinylpyridine-styrene-like derivatives. Cross peaks resonances of  
11  $\text{sp}^2$ -hybridized aromatic carbon in extended aromatic systems with up to several aromatic rings  
12 were also observed (Fig. S1e). The COSY NMR spectra of toner powder demonstrated convoluted  
13 cross-peaks in the aliphatic region reflecting multiple intra-aliphatic correlations (*e.g.*,  $\text{CH}-\text{CH}_x-$   
14  $\text{C}_n\text{H}-\text{CH}_x-\text{C}$ ,  $n=1,2$  and  $x$  varies depending on  $n$ ) probably due to the polymer-based chemicals in  
15 the powder. Cross peaks attributed to non-exchangeable organic hydrogen bonded to  $\text{sp}^2$ -  
16 hybridized carbon in  $\alpha,\beta$ - oxygenated olefins  $(\text{R}-\text{CH}_2-\text{C}_{\text{sp}^2}\text{H}=\text{C}_{\text{sp}^2}\text{H}-\text{O}-\text{X}$  (X: C or H)). The  
17 aromatic range of toner powder COSY NMR spectra (Fig. S1) also depicted the convoluted  
18 methylene cross peaks associated with the polymeric material centered in resonances previously  
19 attributed to non-exchangeable organic hydrogen atoms in styrene (Fig. S1). No cross peaks  
20 indicative of hydrogen atoms in extended aromatic rings were observed.

## 21 2. $^1\text{H}$ - $^1\text{H}$ TCOSY and NOESY

1           The TCOSY NMR spectra for PEPs showed fewer resonances attributed to methyl groups  
2 (H<sub>3</sub>C-CH-X, where X=C or O; Fig. S2a) and cross peaks of oxygenated aliphatics (O-CH-CH-O)  
3 in the  $\delta_H$  3.4-4.5 ppm region (Fig. S2b). Poorly resolved cross peaks in the aliphatic and aromatic  
4 regions were indicative of intra-aliphatic correlations within the same spin system (C-CH-C<sub>n</sub>H-  
5 CH-C, n = 0 - 4) (Fig. S2b) and/or substituted extended aromatic systems. A small fraction of non-  
6 exchangeable organic hydrogen bound to aromatic sp<sup>2</sup>-hybridised carbon showed cross peaks in  
7 the  $\delta_H$  7.0 – 8.0 ppm may be attributed to carboxylic (COO-) and carbonyl (CHO) derivatives (Fig.  
8 S2c) as it is further indicated by the HMBC NMR spectra. The TCOSY NMR spectra of toner  
9 powder further confirmed the presence of long chain unsaturated alcohols in the toner powder and  
10 a strong styrene-based signature. NOESY NMR spectra of PEPs and toner powder (Fig. S3)  
11 depicted cross peaks of methyl, methylene and allylic non-exchangeable organic hydrogen in the  
12 carbohydrate and aromatic regions (Fig. S3a, b). A fewer number of cross peaks was observed in  
13 the aromatic region (Fig. S3c). The reduced number of resonances may be indicative of chemical  
14 species with relatively linear or planar structures that reduces the correlation of hydrogen atoms in  
15 space.

### 16 3. <sup>1</sup>H-<sup>13</sup>C HSQC

17           The HSQC NMR spectra of PEPs and toner powder demonstrated strong similarities in the  
18 aromatic region (*i.e.*,  $\delta_{H/C}$  7.0 – 8.0/105 – 135 ppm; Fig. S4) and significant differences in the  
19 carbohydrate (*i.e.*,  $\delta_{H/C}$  3.5 – 6.0 /55 – 80 ppm; Fig. S4) and aliphatic (*i.e.*,  $\delta_{H/C}$  0.0 – 3.5/0 – 55  
20 ppm; Fig. S4). The majority of cross peaks in PEPs HSQC NMR spectra was associated with sp<sup>3</sup>-  
21 hybridized carbon as compared to toner powder HSQC. Terminal methyl (C-CH<sub>3</sub>) NMR (Fig. S4a)  
22 accounted for most of the C-CH<sub>3</sub> integrals (Fig. S4a,b). spectra that demonstrated a stronger  
23 signature of aliphatic sp<sup>2</sup>-hybridized carbon. Intensive, predominantly for toner powder and to a

1 lesser extend for PEPs, cross-peak resonances in the  $\delta_{\text{H/C}}$  5.0 – 5.5 / 65 – 75 ppm assigned to  
2 aliphatic chain methylene ( $-\text{C}-\text{CH}_2-\text{C}$ ) in close proximity ( $\alpha$ -position) or further away of COX  
3 groups (Fig. S4c,d). In the carbohydrate region, cross-peaks in PEPs HSQC NMR spectra were  
4 minimal and reflected resonances of both  $\text{sp}^3$ - and aromatic  $\text{sp}^2$ -hybridised carbon attached to a  
5 hydroxyl group. For toner powder, stronger COX signatures were also observed in addition to  
6 resonances in the  $\delta_{\text{H/C}}$  3.5 – 6.0 / 55 – 80 ppm; Fig. S4 attributed to  $\text{sp}^2$ -hybridized carbon  
7 ( $\text{R}_2\text{C}=\text{CH}$ ). (cross peaks show direct coupling between Carbon and Hydrogen. The Carbon in the  
8 100-150 ppm are attributed to aromatic or  $\text{R}_2\text{C}=\text{CR}_2$  functional groups. For styrene, C2 and C6  
9 resonate at 113.85 ppm and C3 and C5 at 127.53. The peak at 1.60 ppm was attributed to  $\text{CH}_2\beta$  of  
10 styrene and is coupled with the  $\text{C}\beta$  signal at 31.05 ppm in the HSQC. The HSQC spectrum shows  
11 no cross peaks with any of the proton signal suggesting that  $\text{C}\alpha$  is quaternary. The Carbon signal  
12 at 156.41 ppm was attributed to the C4 carbon of the styrene aromatic ring. Substitution with an  
13 alkyl ether is responsible for the shift of the signal to higher field compared to C4 unsubstituted  
14 resonance around 120-130 ppm. The HMBC spectrum shows cross peaks with C4 and the styrene  
15 aromatic protons in the ortho and meta position (6.80 and 7.11 ppm) as well as cross peaks with  
16 signals at 4.28, 4.14, 4.08, 3.91 and 3.77 ppm that come from protons in  $\alpha$  position of an oxygen  
17 (ether, ester or carbonyl group).  $\text{C}_1$  at 143.58 ppm was also coupled with  $\text{H}_3$  and  $\text{H}_5$  protons at 6.80  
18 ppm and methylene  $\text{C}\beta\text{H}_2$  proton at 1.60 ppm. The  $\text{C}\beta$  is coupled with peaks at 1.28 ppm and 0.88  
19 ppm that are attributed to branched methyl in alpha carbon of the polymer backbone.

#### 20 4. $^1\text{H}$ - $^{13}\text{C}$ HMBC

21 In the HMBC spectrum, the protons of methylene in  $\beta$  position is also coupled with  $\text{C}\alpha$   
22 (41.72 ppm) and  $\text{C}_1$  (143.58 ppm) of styrene ( $\text{C}_1$  links the aromatic ring and aliphatic backbone).

1 The COSY spectrum show couplings with peaks at 4.13 and 1.47 ppm. The HMBC spectrum show  
2 coupling between the carbon at 165.28 and the proton signal at 5.48 suggesting that the propylene  
3 group is linked to an ester group. The H proton at 1.25 ppm is coupled to the Carbon at 29.71 ppm  
4 and is attributed to methylene protons ( $\text{CH}_2$ ) in aliphatic backbone and branched chains of  
5 polyester polymers. The COSY show a cross peak between 1.25 and 0.88 ( $\text{CH}_3$ ) ppm and is  
6 attributed to chain of poly aliphatic compound. In the HSQC this signal is coupled to the Carbon  
7 at 129.64 ppm and in the HMBC it is coupled with signals at 134.13 ppm and at 165.28 ppm that  
8 corresponds to an ester ( $-\text{C}=\text{O}(\text{O})-$ ) or amide ( $\text{R}-\text{CONHR}$ ) protons. This fits well with  $^{13}\text{C}$  NMR  
9 spectra of terephthalic acid found in the literature. Also, the peak at 165.28 ppm is coupled with  
10 the proton signal at 5.48 ppm, it is linked to the propylene unit. The COSY doesn't show any  
11 coupling with the peaks at 6.80 and 7.11 ppm ruling out the possibility of 4-vinylpyridine-stryene  
12 copolymer that presents the same type of signature in the aromatic region of the NMR spectrum.  
13 In the HSQC this signal is coupled to the Carbon at 129.64 ppm and in the HMBC it is coupled  
14 with signals at 134.13 ppm and at 165.28 ppm that corresponds to an ester ( $-\text{C}=\text{O}(\text{O})-$ ) or amide  
15 ( $\text{R}-\text{CONHR}$ ) protons. This fits well with  $^{13}\text{C}$  NMR spectra of terephthalic acid found in the  
16 literature. Also, the peak at 165.28 ppm is coupled with the proton signal at 5.48 ppm, it is linked  
17 to the propylene unit.

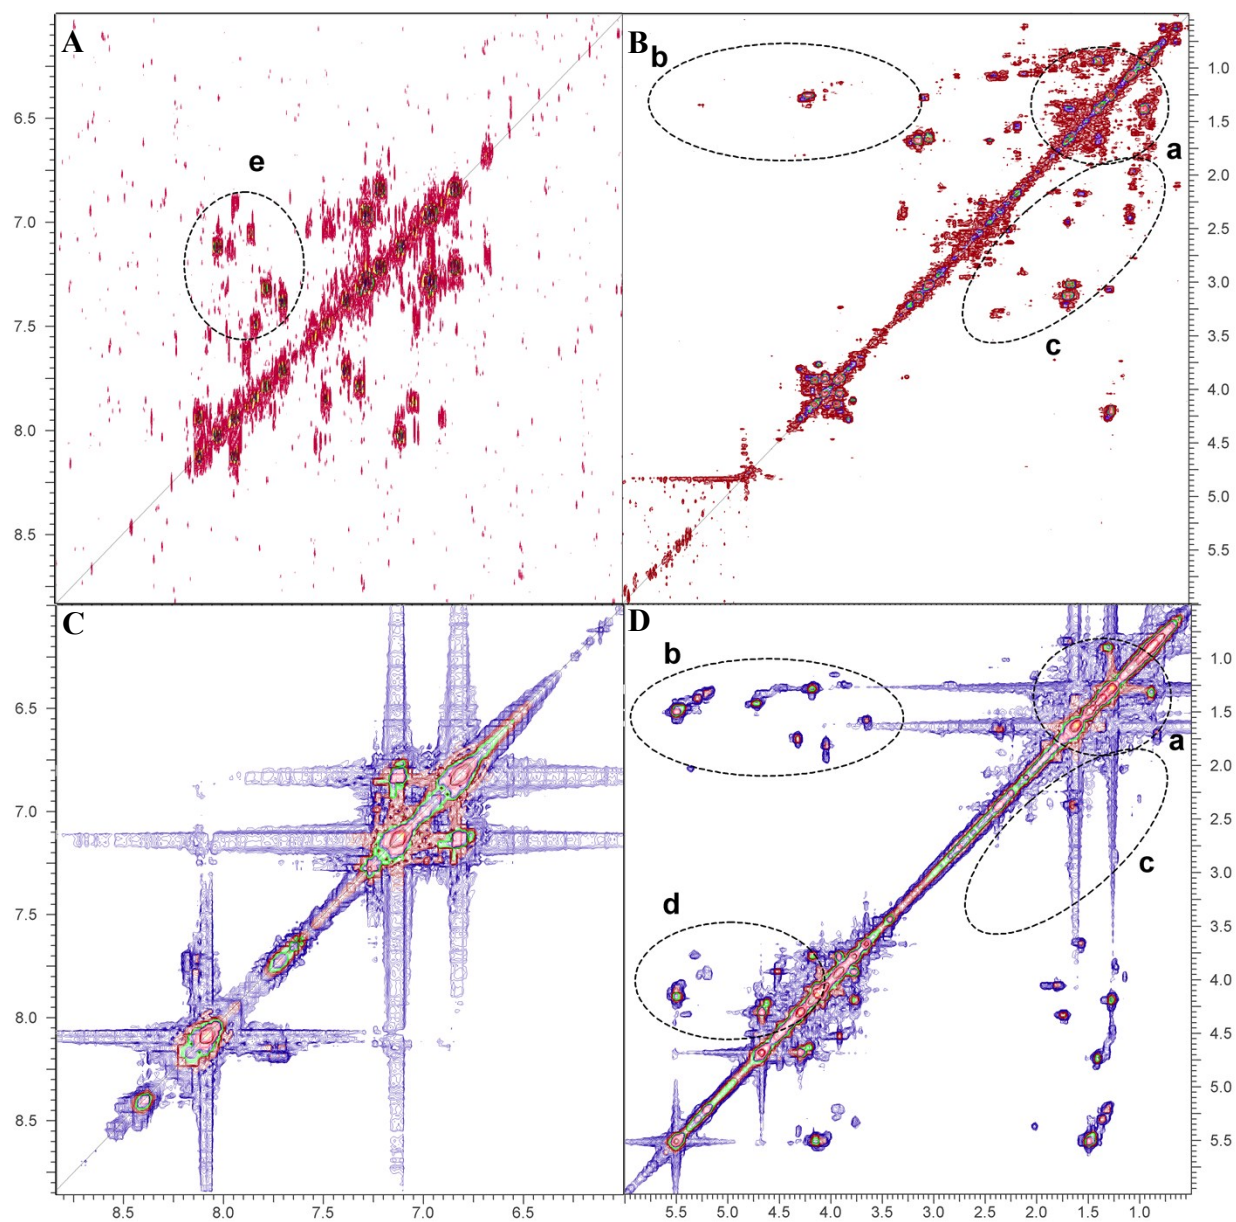

2

3 **Figure S1.**  $^1\text{H}$ - $^1\text{H}$  COSY NMR spectra of PEPs (PM<sub>2.5</sub>) (A,B) and toner powder (C,D): aromatic  
 4 region ( $\delta_{\text{H}} = 5.5\text{--}9.0$  ppm; aromatic and olefinic cross peaks); aliphatic and carbohydrate region  
 5 ( $\delta_{\text{H}} = 0.5\text{--}5.5$  ppm; aliphatic cross peaks).

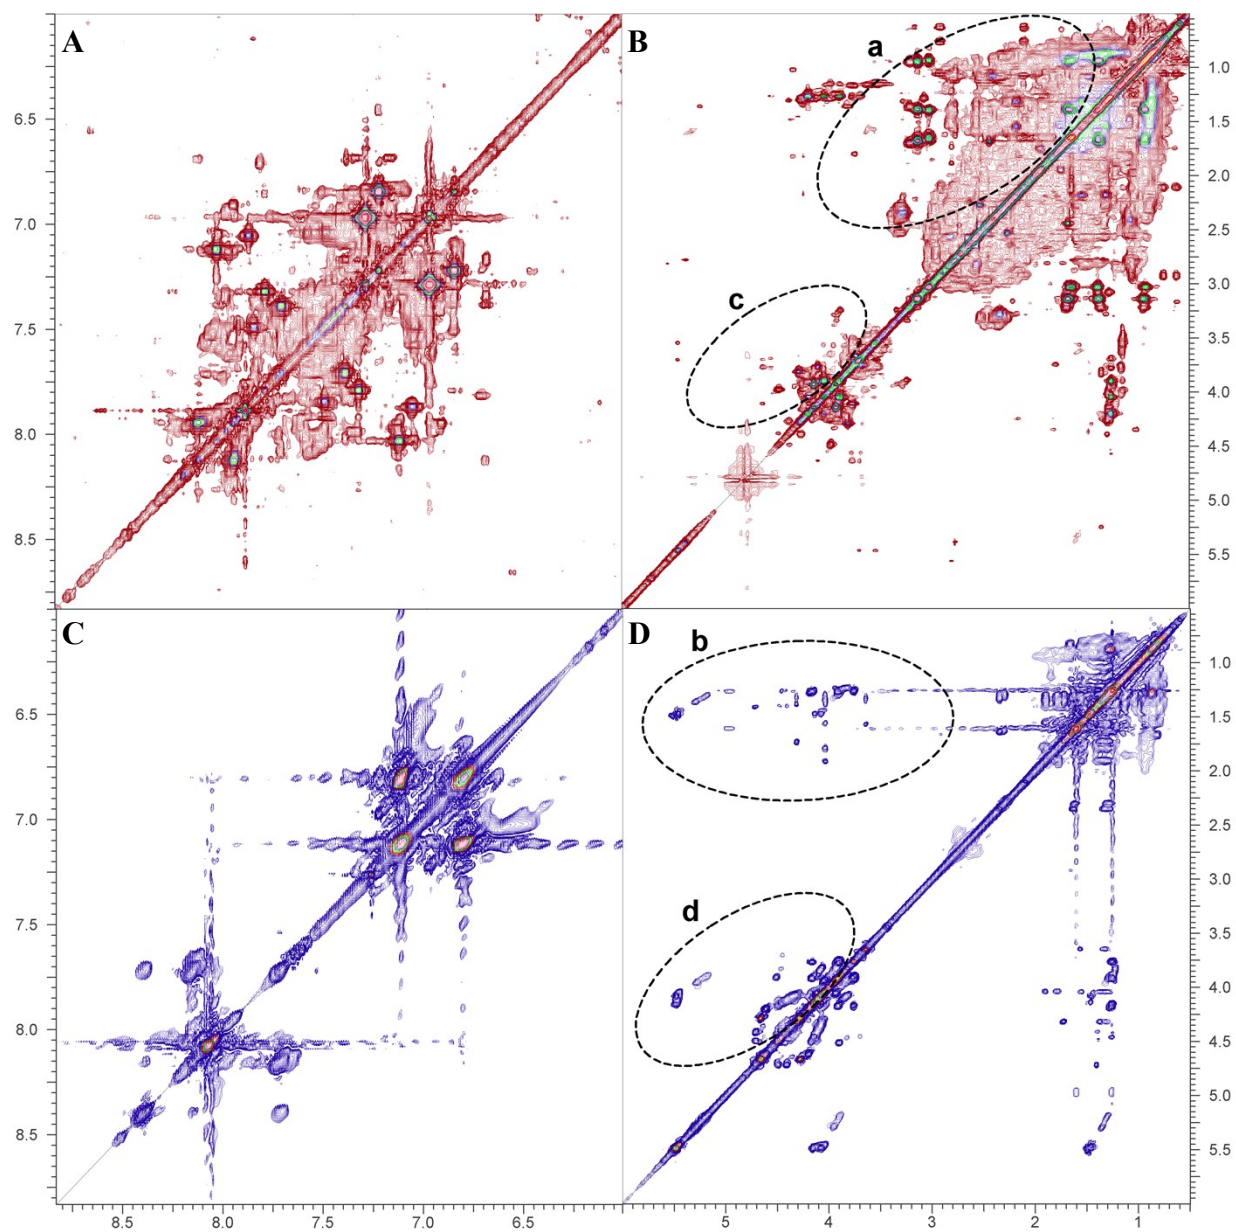

**Figure S2.**  $^1\text{H}$ - $^1\text{H}$  TCOSY NMR spectra of PEPs ( $\text{PM}_{2.5}$ ) (A,B) and toner powder (C,D): aromatic region ( $\delta_{\text{H}} = 5.5\text{--}9.0$  ppm; aromatic and olefinic cross peaks); aliphatic and carbohydrate region ( $\delta_{\text{H}} = 0.5\text{--}1.0$  ppm; aliphatic cross peaks).

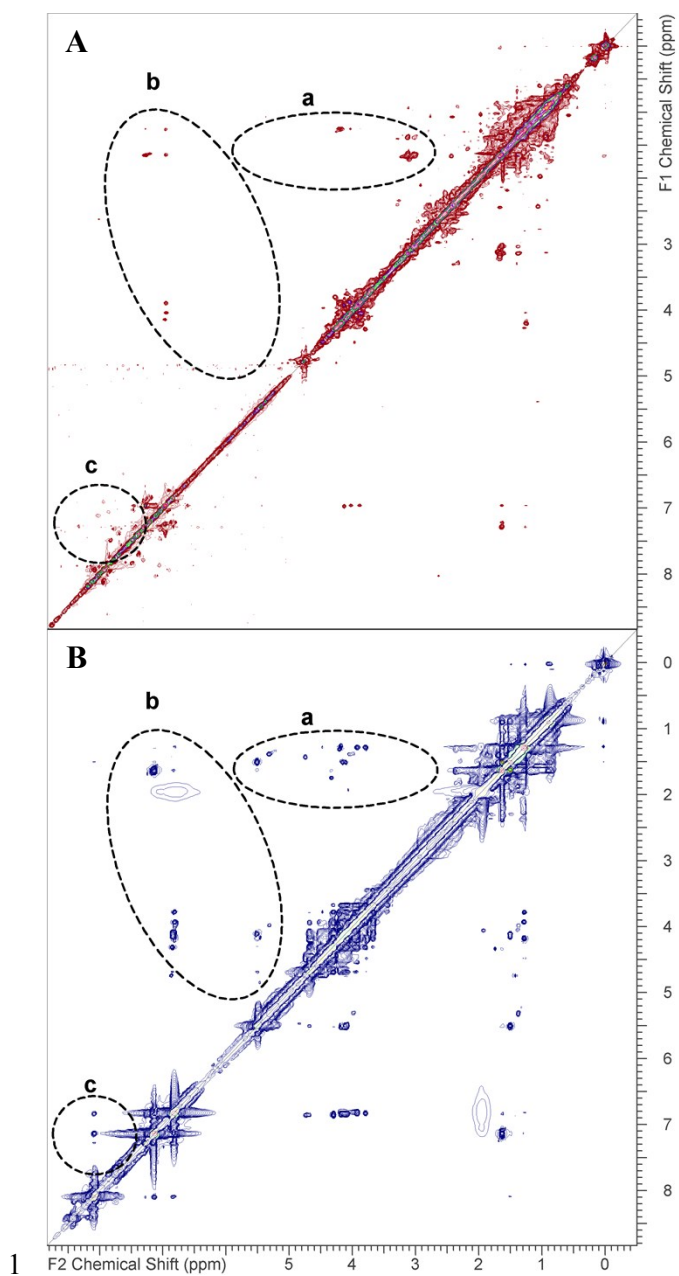

2 **Figure S3.**  $^1\text{H}$ - $^1\text{H}$  NOESY NMR spectra of PEPs (PM<sub>2.5</sub>) (A) and toner powder (B).



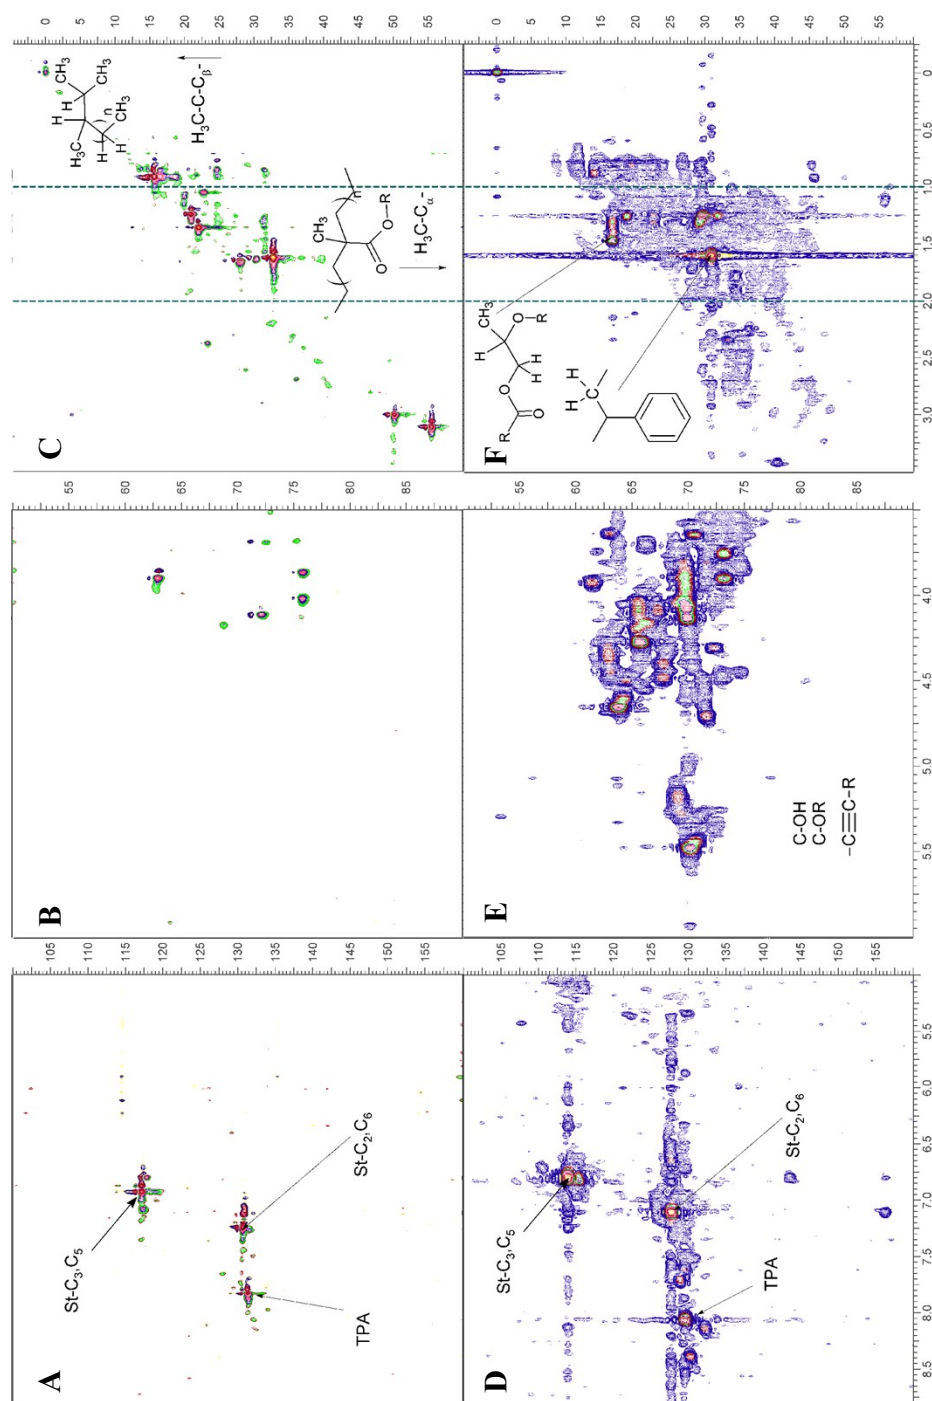

**Figure S4.**  $^1\text{H}$ - $^{13}\text{C}$  HSQC NMR spectra of PEPs ( $\text{PM}_{2.5}$ ) (A,B,C) and toner powder (D,E,F): aromatic region ( $\delta_{\text{H}} = 5.5\text{--}9.0$  ppm/  $\delta_{\text{C}} = 50\text{--}90$  ppm; aromatic and olefinic cross peaks); carbohydrate region ( $\delta_{\text{H}} = 5.5\text{--}9.0$  ppm/  $\delta_{\text{C}} = 100\text{--}160$  ppm; alcohols, ethers and esters cross peaks); aliphatic region ( $\delta_{\text{H}} = 0.5\text{--}4.0$  ppm/  $\delta_{\text{C}} = 0\text{--}55$  ppm; aliphatic cross peaks)

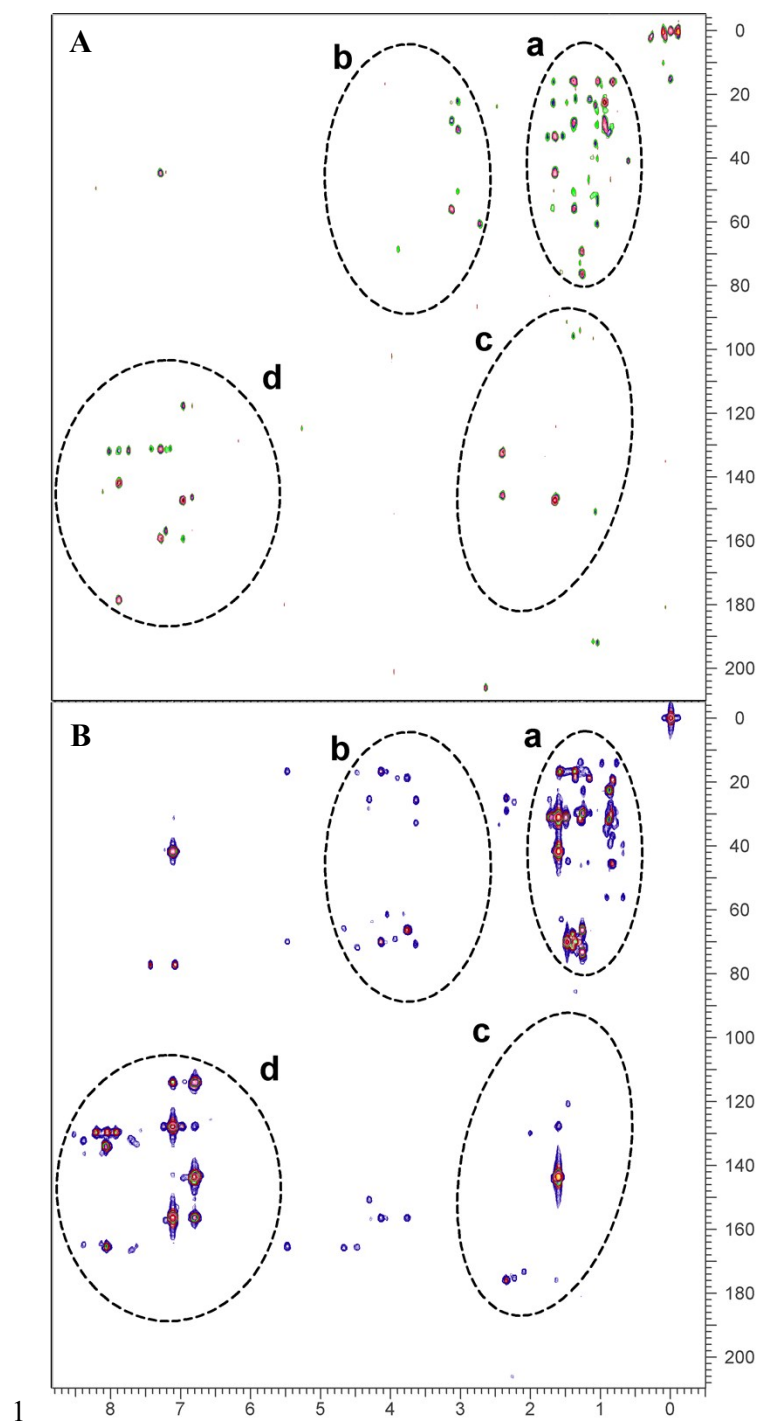

**Figure S5.**  $^1\text{H}$ - $^{13}\text{C}$  HMBC NMR spectra of PEPs (PM<sub>2.5</sub>) (A) and toner powder (B).

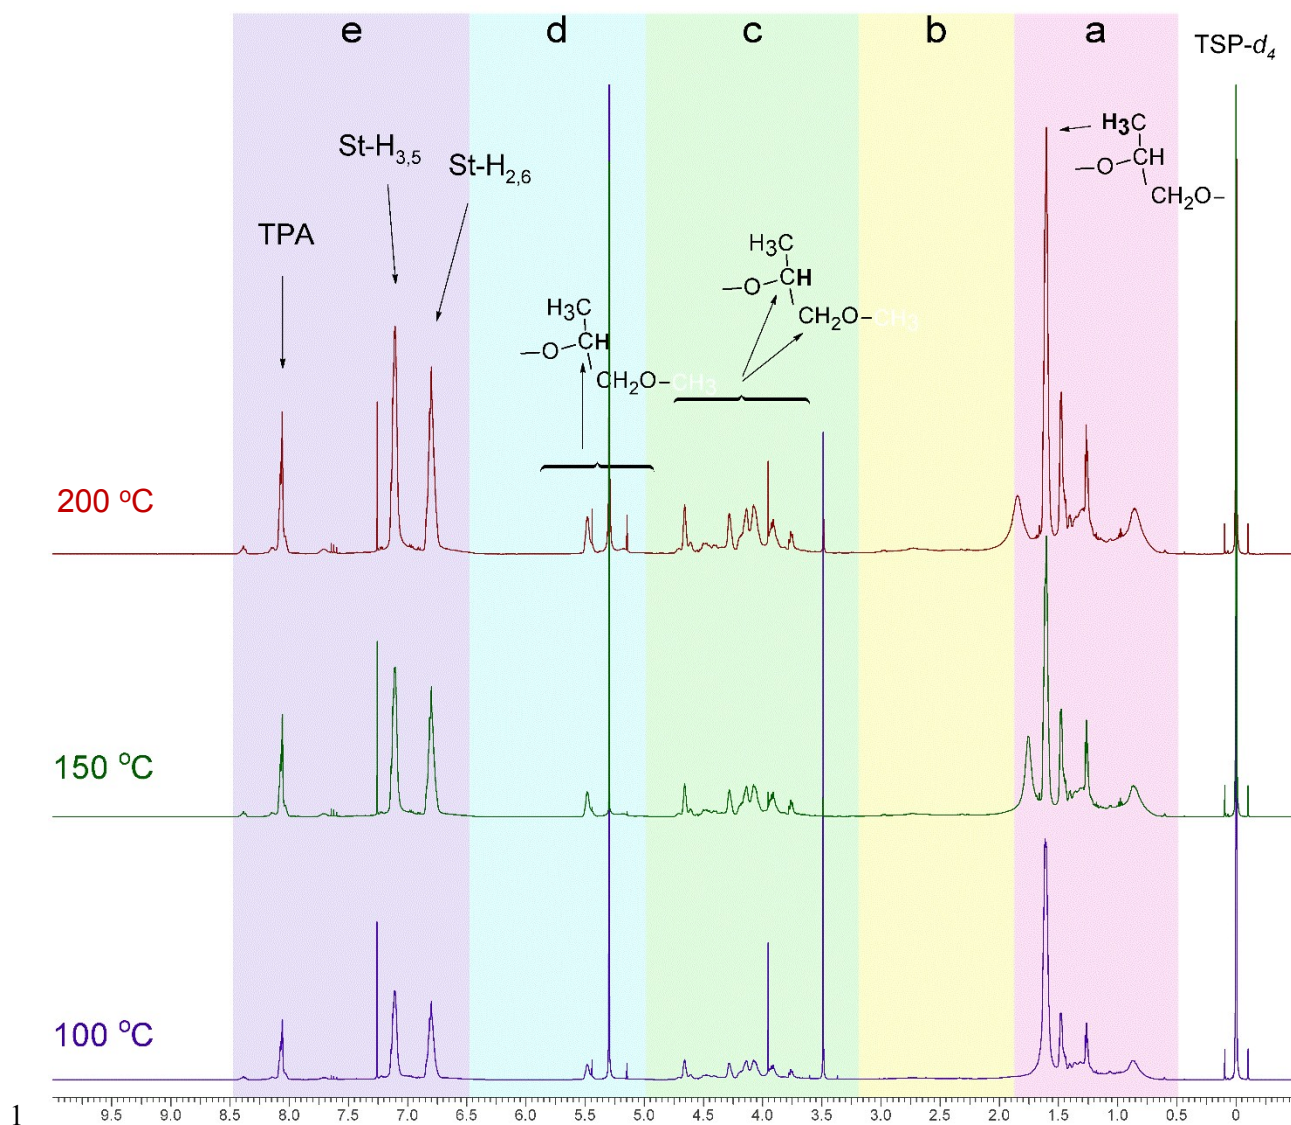

**Figure S6.**  $^1\text{H}$  NMR spectra ( $\delta_{\text{H}}$  0 – 10.5 ppm) of toner powder thermally heated at 100°C, 150°C and 200°C acquired with solvent suppression and exclusion regions for residual H<sub>2</sub>O. Functional structure are indicated from right to the left: (a) aliphatic carbon (**HCCC**); (b) “allylic-analogue” (**HC-C=X**); (c) carbohydrate-like and methoxy (**HC-O**); (d) olefinic (**R-CH=CH-R** and **O-CH-O**); and (e) aromatic (**HC<sub>ar</sub>**). The respective spectral intensities were scaled to 100% total integral within the entire region of chemical shift ( $\delta_{\text{H}}$  0.7–10.5 ppm; with residual water excluded).
